# Supplementary material
Source: PubMed Central journal article supplement (PMC8448590)
Supplement: EMS134648-supplement-Appendix.pdf [file EMS134648-supplement-Appendix.pdf]

180 **Appendix for**  
181 **Ability of AZD1222 vaccination to elicit neutralising antibodies**  
182 **against SARS-CoV-2 VOC B.1.617.2 (Delta)**  
183

184 Emma C Wall\*<sup>1,2</sup>, Mary Wu\*<sup>1</sup>, Ruth Harvey\*<sup>3</sup>, Gavin Kelly<sup>1</sup>, Scott Warchal<sup>1</sup>, Chelsea  
185 Sawyer<sup>1</sup>, Rodney Daniels<sup>3</sup>, Lorin Adams<sup>3</sup>, Philip Hobson<sup>1</sup>, Emine Hatipoglu<sup>4</sup>, Yenting Ngai<sup>4</sup>,  
186 Saira Hussain<sup>1</sup>, Karen Ambrose<sup>1</sup>, Steve Hindmarsh<sup>1</sup>, Rupert Beale<sup>1,2,6</sup>, Andrew Riddell<sup>1</sup>,  
187 Steve Gamblin<sup>1</sup>, Michael Howell<sup>1</sup>, George Kassiotis<sup>1,5</sup>, Vincenzo Libri<sup>2,4</sup> Bryan Williams <sup>2,4</sup>,  
188 Charles Swanton<sup>1,4</sup>, Sonia Gandhi\*<sup>1,4</sup>, David LV Bauer\*<sup>1,6</sup>

189  
190 **Affiliations**

- 191 1. The Francis Crick Institute, 1 Midland Road, London, UK
- 192 2. National Institute for Health Research (NIHR) University College London Hospitals  
193 (UCLH) Biomedical Research Centre and NIHR UCLH Clinical Research Facility,  
194 London, UK
- 195 3. Worldwide Influenza Centre, The Francis Crick Institute, 1 Midland Road, London,  
196 UK
- 197 4. University College London, Gower Street, London
- 198 5. Department of Infectious Disease, St Mary's Hospital, Imperial College London,  
199 London, UK
- 200 6. Genotype-to-Phenotype UK National Virology Consortium (G2P-UK)

201  
202 \*These authors contributed equally to this work.

203  
204 **Lead Authors:** George Kassiotis [George.Kassiotis@crick.ac.uk](mailto:George.Kassiotis@crick.ac.uk), Charles Swanton  
205 [charles.swanton@crick.ac.uk](mailto:charles.swanton@crick.ac.uk), Sonia Gandhi [sonia.gandhi@crick.ac.uk](mailto:sonia.gandhi@crick.ac.uk), and David LV Bauer  
206 [david.bauer@crick.ac.uk](mailto:david.bauer@crick.ac.uk)

207  
208 **Correspondence to:** David LV Bauer [david.bauer@crick.ac.uk](mailto:david.bauer@crick.ac.uk)  
209

210  
211  
212 **Contents**

- 213 Figures 1-4  
214 Tables 1-3  
215 Methods

## 216 **Methods**

217

### 218 ***Clinical cohort***

219 Two prospective cohorts of Legacy participants were established in January 2021  
220 (NCT04750356). Participants were included if they were an employee of either UCLH or the  
221 Francis Crick Institute and had submitted at least one sample for RT-qPCR occupational  
222 health testing for COVID-19 using the Crick testing pipeline. Participants consisted of patient-  
223 facing healthcare workers at UCLH, who had received at least one dose of a currently licensed  
224 COVID-19 vaccine and Crick staff. Participants were sampled at approximately 3 weeks post-  
225 vaccination and invited for follow-up visits at approximately 6 and 12 weeks. All participants  
226 were sampled at each visit with additional nasopharyngeal RT-qPCR for SARS CoV-2 (in  
227 addition to their occupational health testing) to exclude concurrent active infection, blood was  
228 collected for serological assays. Participants were analysed by vaccine type, vaccine dose  
229 number, date since vaccine dose, and self-reported prior COVID-19 symptoms.

230

### 231 ***Serological Analysis and Live-virus Neutralisation***

232 All serological analysis, including live-virus neutralisation assay, were performed exactly as  
233 previously described (**Wall, Wu et al., Lancet, 2021**)

234

### 235 ***Data analysis, statistics***

236 Study data were collected and managed using REDCap electronic data capture tools hosted  
237 at University College London<sup>8,9</sup>. Data were exported from REDCap into R for visualisation and  
238 analysis. IC<sub>50</sub> values above the quantitative limit of detection of the assay (>2560) were  
239 recoded as 5120; IC<sub>50</sub> values below the quantitative limit of the assay (< 40) but within the  
240 qualitative range were recoded as 10 and data below the qualitative range (i.e. no response  
241 observed) were recoded as 5. These changes do not affect any statistical parameters  
242 considered in the analysis and we do not perform analyses that consider that consider the  
243 absolute value of the points – i.e. rank-based analyses are used instead: statistical  
244 significance of the difference in median viral neutralisation IC<sub>50</sub> values between different  
245 strains was performed using a paired Wilcoxon Ranked sum test. *p*-values reported have not  
246 been corrected for multiple testing. Fold-changes in median NAbTs (and 95% confidence  
247 intervals) between BNT162b2 and AZD1222 cohorts were determined using bootstrap  
248 statistics using the ‘*boot*’ package in R, specifying vaccine type using the *strata* option. All  
249 graphs were generated using the ‘*ggplot2*’ package. Analyses of stratified NAb responses by  
250 strain, vaccine type, and COVID symptoms of participants, were carried out using the *prop.test*  
251 function of the ‘*stats*’ package in R, and ordered logistic regression using the *lrm* function of

252 the Regression Modeling Strategies (*'rms'*) package in R, using the formula  $IC50$   
253  $\sim Strain*VaccineType$  or  $IC50 \sim Strain*COVIDsymptoms$ , and *p*-values were calculated using  
254 the Wald Chi-Square test. Analysis of variance was carried out using the *anova* function in R.

255

### 256 **Data Sharing**

257 All data (anonymised) and full R code to produce all figures and statistical analysis presented  
258 in this manuscript are freely-available online on Github: [https://github.com/davidlvb/Crick-](https://github.com/davidlvb/Crick-UCLH-Legacy-AZ-VOCs-2021-06)  
259 [UCLH-Legacy-AZ-VOCs-2021-06](https://github.com/davidlvb/Crick-UCLH-Legacy-AZ-VOCs-2021-06)

260

### 261 **Ethics**

262 The Legacy study was approved by London Camden and Kings Cross Health Research  
263 Authority (HRA) Research and Ethics committee (REC) IRAS number 286469 and sponsored  
264 by University College London.

265

### 266 **Role of the funding source**

267 This work was undertaken at UCLH/UCL who received a proportion of funding from the  
268 National Institute for Health Research (NIHR) University College London Hospitals  
269 Department of Health's NIHR Biomedical Research Centre (BRC). EW, VL and BW are  
270 supported by the Centre's funding scheme. This work was supported jointly by the BRC and  
271 core funding from the Francis Crick Institute, which receives its funding from Cancer Research  
272 UK, the UK Medical Research Council, and the Wellcome Trust. DLVB is additionally  
273 supported by the Genotype-to-Phenotype National Virology Consortium (G2P-UK) via UK  
274 Research and Innovation and the UK Medical Research Council. The funders of the study had  
275 no role in study design, data collection, data analysis, data interpretation, or writing of the  
276 report. The corresponding authors had full access to all the data and the final responsibility to  
277 submit for publication.

278

### 279 **Contributors Statement**

280 Emma C Wall - Investigation, Data Curation, Writing - original draft. Has access to & has verified  
281 underlying data.

282 Mary Wu - Investigation, Methodology, Resources, Writing – review & editing, Conceptualization

283 Ruth Harvey - Investigation, Methodology, Resources, Writing – review & editing, Conceptualization

284 Gavin Kelly - Formal Analysis, Validation

285 Scott Warchal - Software, Methodology, Formal Analysis

286 Chelsea Sawyer - Software, Methodology, Formal Analysis

287 Rodney Daniels - Investigation

288 Lorin Adams - Investigation

289 Philip Hobson - Investigation

290 Emine Hatipoglu - Project administration, Conceptualization

291 Yenting Ngai - Project administration, Conceptualization

292 Saira Hussain - Investigation, Resources

293 Karen Ambrose - Supervision, Software, Methodology

349 **Supplementary References**

350

351 1. Ng KW, Faulkner N, Cornish GH, et al. Preexisting and de novo humoral immunity to  
352 SARS-CoV-2 in humans. *Science* 2020; **370**(6522): 1339-43.

353 2. Houlihan CF, Vora N, Byrne T, et al. Pandemic peak SARS-CoV-2 infection and  
354 seroconversion rates in London frontline health-care workers. *Lancet* 2020; **396**(10246):  
355 e6-e7.

356 3. Brown JC, Goldhill DH, Zhou J, et al. Increased transmission of SARS-CoV-2 lineage  
357 B.1.1.7 (VOC 202012/01) is not accounted for by a replicative advantage in primary  
358 airway cells or antibody escape. *bioRxiv* 2021: 2021.02.24.432576.

359 4. Cele S, Gazy I, Jackson L, et al. Escape of SARS-CoV-2 501Y.V2 from neutralization by  
360 convalescent plasma. *Nature* 2021; **593**(7857): 142-6.

361 5. Faulkner N, Ng KW, Wu M, et al. Reduced antibody cross-reactivity following infection  
362 with B.1.1.7 than with parental SARS-CoV-2 strains. *bioRxiv* 2021: 2021.03.01.433314.

363 6. Rihn SJ, Merits A, Bakshi S, et al. A plasmid DNA-launched SARS-CoV-2 reverse  
364 genetics system and coronavirus toolkit for COVID-19 research. *PLoS Biol* 2021; **19**(2):  
365 e3001091.

366 7. van den Brink EN, Ter Meulen J, Cox F, et al. Molecular and biological characterization  
367 of human monoclonal antibodies binding to the spike and nucleocapsid proteins of severe  
368 acute respiratory syndrome coronavirus. *J Virol* 2005; **79**(3): 1635-44.

369 8. Harris PA, Taylor R, Minor BL, et al. The REDCap consortium: Building an international  
370 community of software platform partners. *J Biomed Inform* 2019; **95**: 103208.

371 9. Harris PA, Taylor R, Thielke R, Payne J, Gonzalez N, Conde JG. Research electronic  
372 data capture (REDCap)--a metadata-driven methodology and workflow process for  
373 providing translational research informatics support. *J Biomed Inform* 2009; **42**(2): 377-  
374 81.

375
